# Supplementary material for: Rationally designed cellulose hydrogel for an ultrasensitive pressure sensor
Source: Royal Society of Chemistry journal article supplement (doi:10.1039/d3mh01051a), 2023-01-01
Supplement: d3mh01051a1.pdf [file d3mh01051a1.pdf]

## Supporting Information

# Rationally Designed Cellulose Hydrogel for Ultrasensitive Pressure Sensor

*Minzhang Chen,<sup>a,b</sup> Huixiong Wan,<sup>a,b</sup> Yang Hu,<sup>a,b</sup> Fengyan Zhao,<sup>a,b</sup> Xiaoni An,<sup>a,b</sup> Ang*

*Lu<sup>\*a,b</sup>*

<sup>a</sup> College of Chemistry and Molecular Sciences, Wuhan University, Wuhan 430072,  
China

<sup>b</sup> Hubei Engineering Center of Natural Polymer-based Medical Materials, Wuhan  
University, Wuhan 430072, China

\* To whom correspondence should be addressed. Phone: +86-27-87219274. E-mail:

[anglu@whu.edu.cn](mailto:anglu@whu.edu.cn) (A. L.)

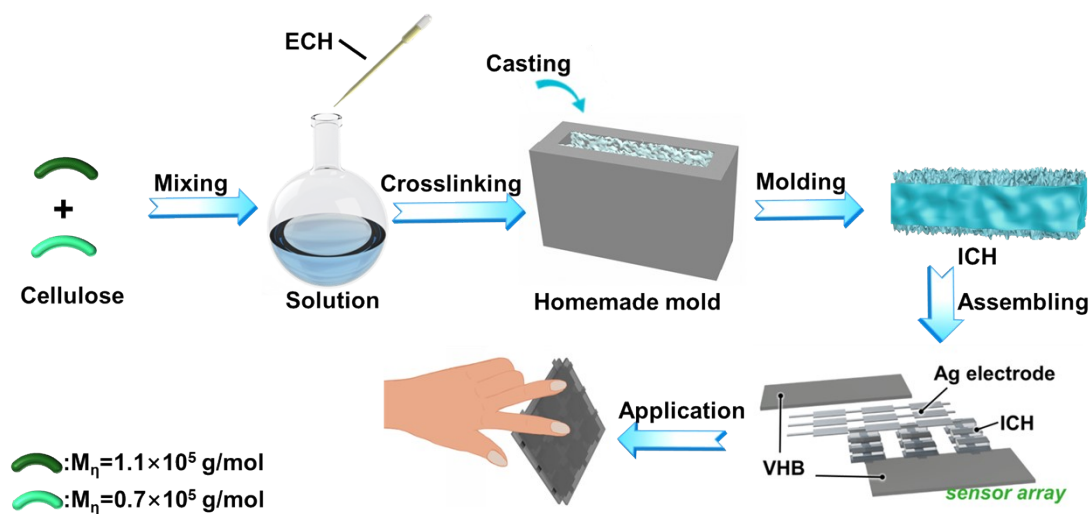

**Figure S1.** Preparation of ICHs.

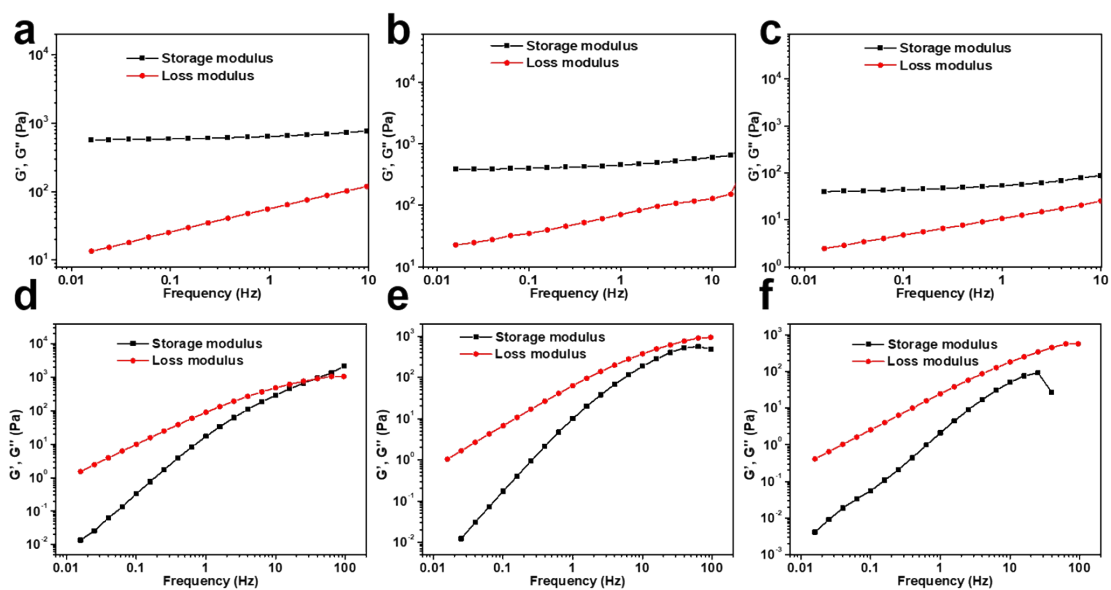

**Figure S2.** Storage modulus ( $G'$ ) and loss modulus ( $G''$ ) of the (a) C6/0R0 ICH, (b) C4/2R0 ICH, (c) C2/4R0 ICH, (d) C6/0R0 solution, (e) C4/2R0 solution, (f) C2/4R0 solution.

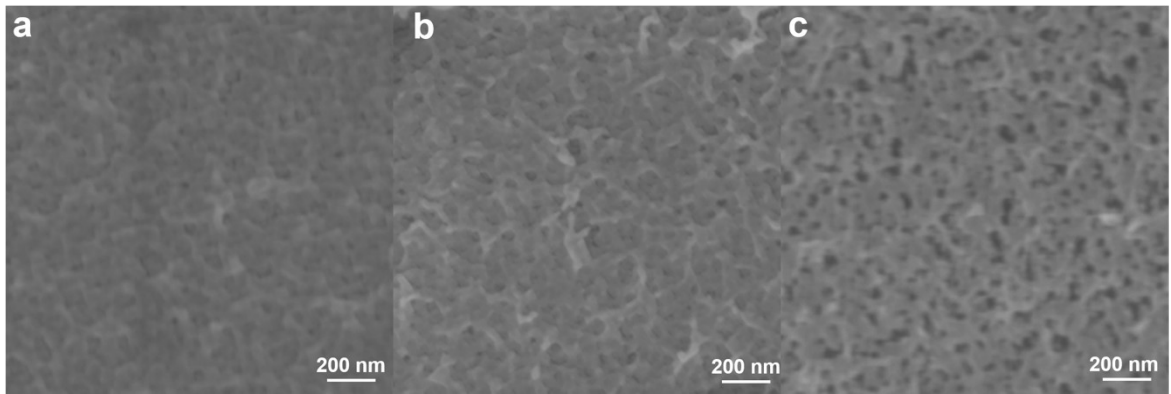

**Figure S3.** SEM images of (a) C6/0R0, (b) C4/2R0, and (c) C2/4R0.

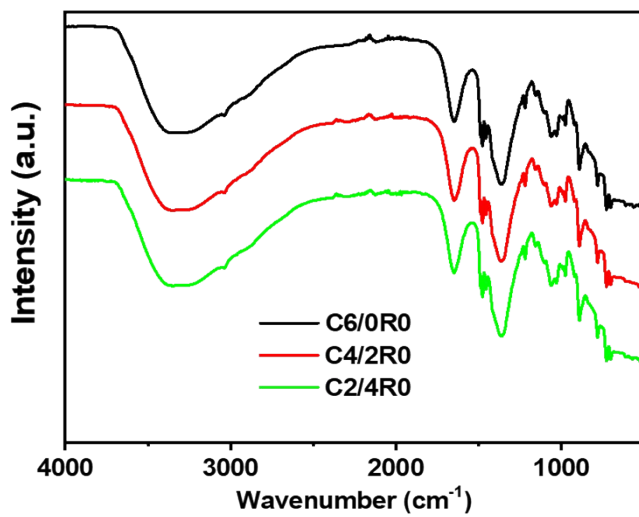

**Figure S4.** FT-IR spectra of the ICHs.

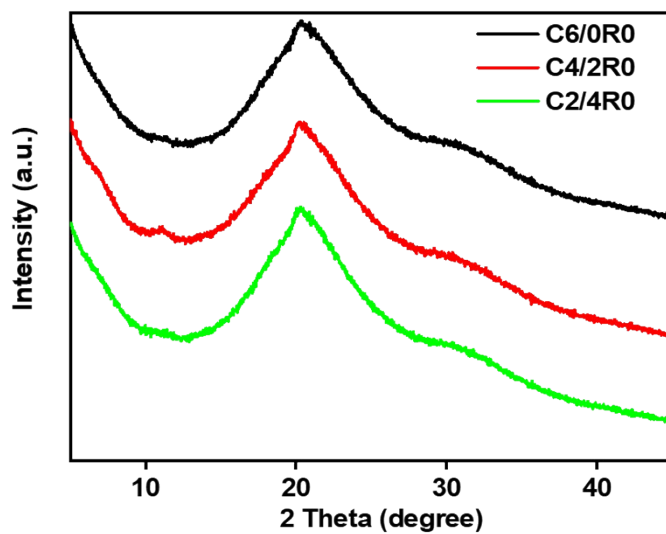

**Figure S5.** XRD patterns of the ICHs.

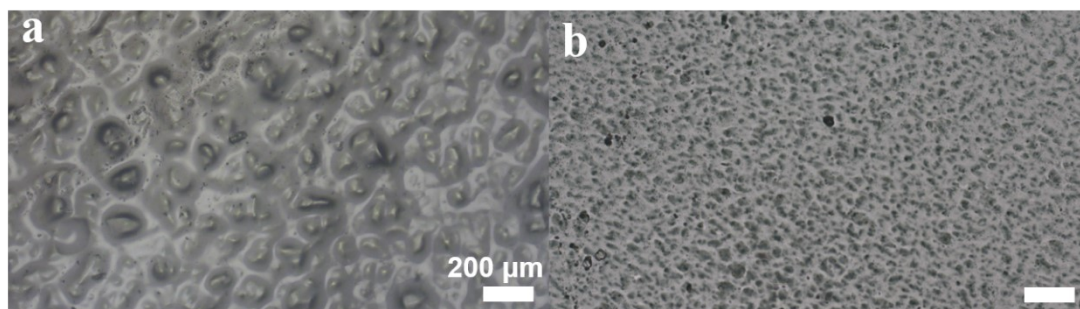

**Figure S6.** Optical microscope images of (a) C6/0R500, and (b) C6/0R1000.

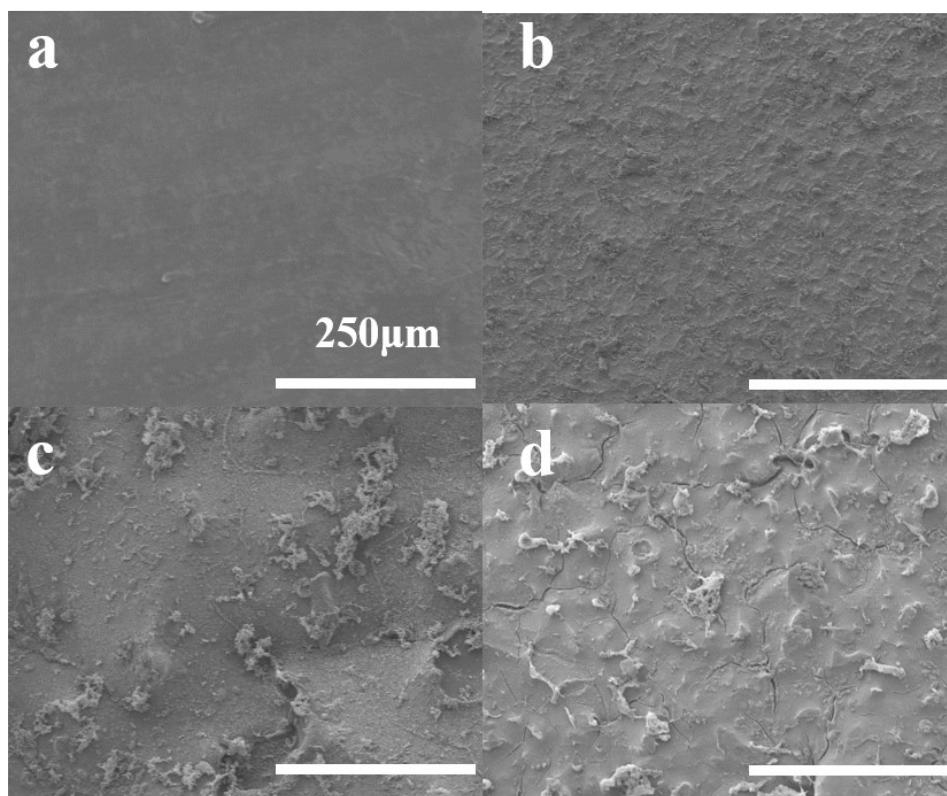

**Figure S7.** Surface SEM images of (a) C6/0R0, (b) C6/0R1000, (c) C6/0R500, and (d)

C6/0R100.

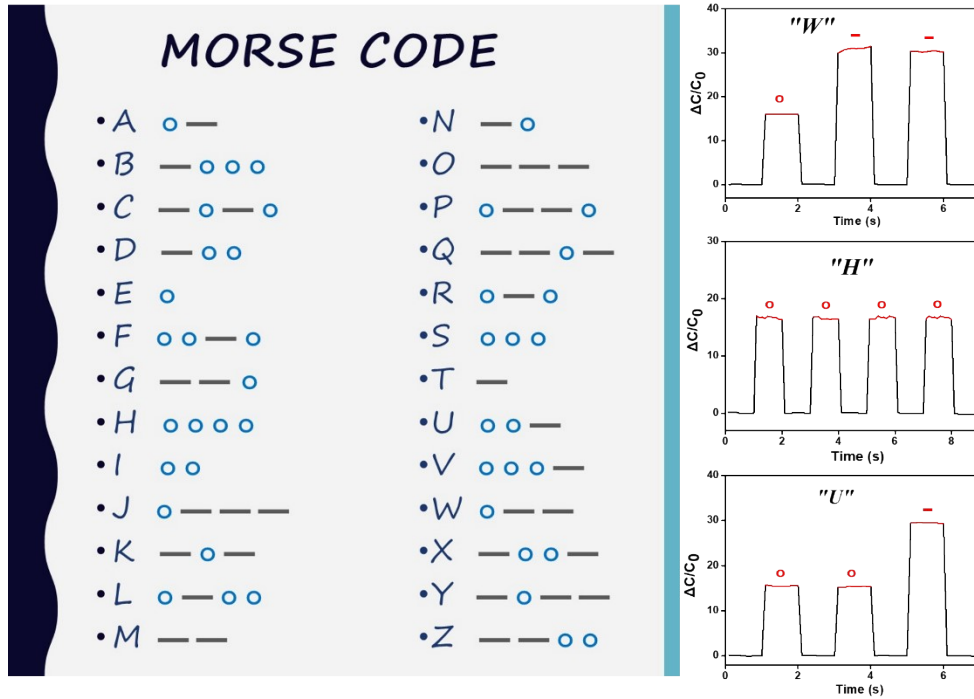

**Figure S8.** Use Morse code to type “W”, “H”, “U” by tapping on the ICH pressure sensor.

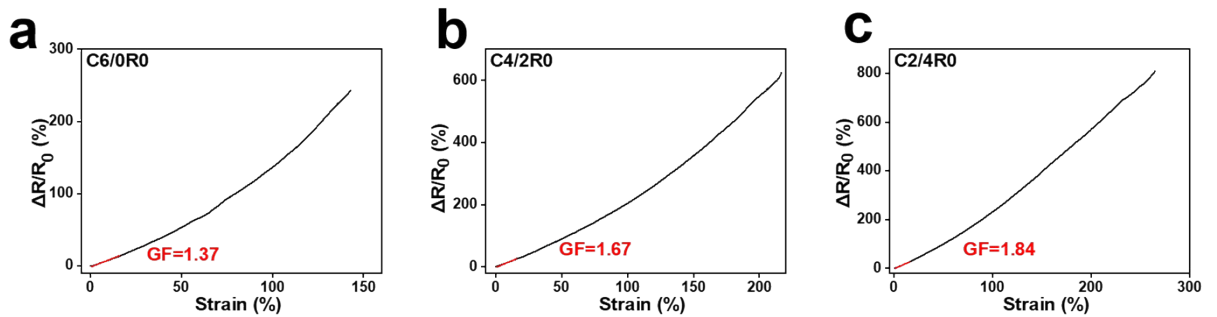

**Figure S9.** The  $\Delta R/R_0$  and GF of (a) C6/0R0 ICH, (b) C4/2R0 ICH, and (c) C2/4R0 ICH.

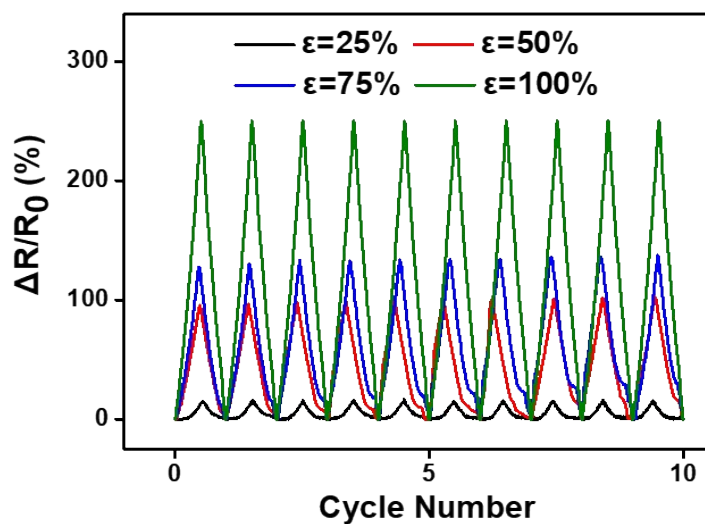

**Figure S10.** Resistance response of repeated stretching tests of the C2/4R0 at different strains (25%, 50%, 75% and 100%).

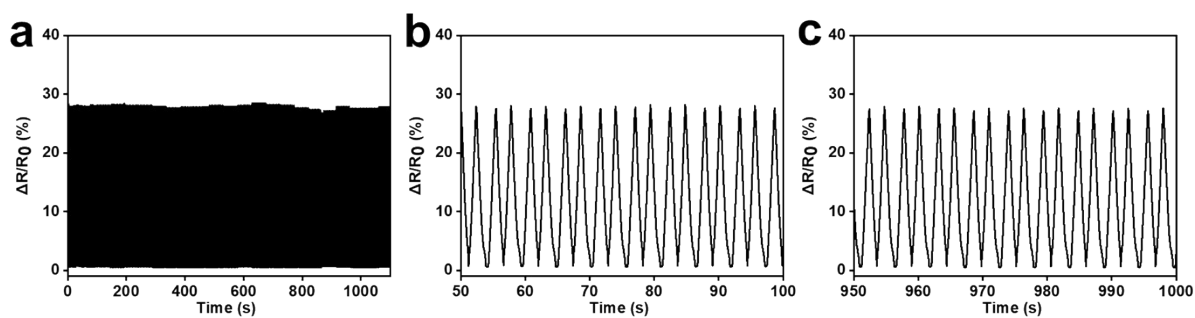

**Figure S11.** (a) Resistance response of the C2/4R0 with applied tensile strain between 0 and 20% for 500 cycles; before (b) and after (c) the cycle.

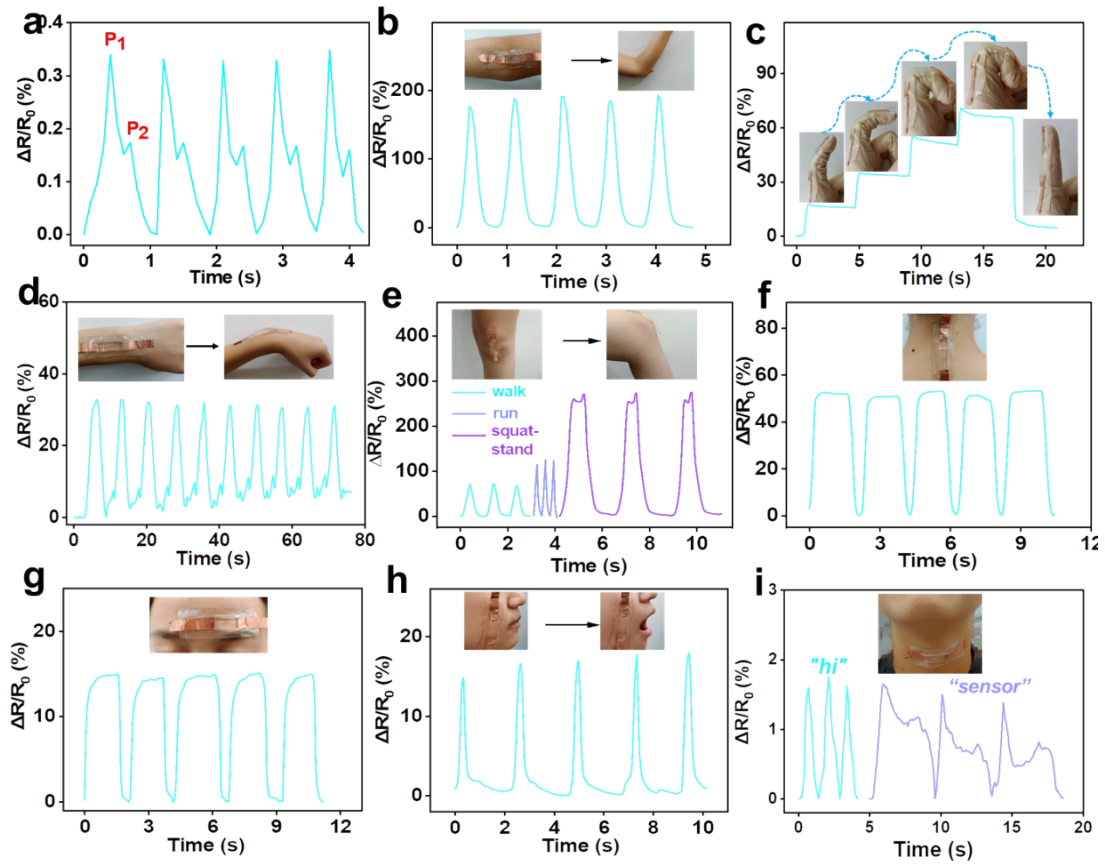

**Figure S12.** (a) The recorded relative resistance change of blood pulse. Response of ICH sensor in monitoring bending of (b) arm, (c) finger, (d) wrist and (e) knee, (f) bowing, (g) frowning, (h) opening mouth. (i) Monitored real-time  $\Delta R/R_0$  signals from speaking "hi" and "sensor".

**Table S1.** Mesh parameters obtained from ICHs and cellulose solutions.

| Samples         | $^1N$ ( $m^{-3}$ )      | $d_{mesh}$ (nm) |
|-----------------|-------------------------|-----------------|
| C6/0R0 solution | $3.15 \diamond 10^{23}$ | 14.7            |
| C4/2R0 solution | $1.20 \diamond 10^{23}$ | 20.3            |
| C2/4R0 solution | $0.15 \diamond 10^{23}$ | 40.5            |
| C6/0R0 ICH      | $2.07 \diamond 10^{23}$ | 16.9            |
| C4/2R0 ICH      | $1.51 \diamond 10^{23}$ | 18.8            |

**Table S2.** Conductivity of the reported ionic conductive hydrogels.

| Material                               | Ionic Conductor            | Conductivity (S·m <sup>-1</sup> ) | Reference        |
|----------------------------------------|----------------------------|-----------------------------------|------------------|
| PAM/PEO                                | LiCl                       | 8                                 | 1                |
| PVA/PAM                                | NaCl                       | 6.23                              | 2                |
| <i>C2/4R0</i>                          | <i>BzMe<sub>3</sub>NOH</i> | <i>3.17</i>                       | <i>This work</i> |
| PAAm/LiCl                              | LiCl                       | 3.8-8.1                           | 3                |
| PVA/HPC                                | NaCl                       | 3.4                               | 4                |
| PAAM/Laponite                          | Citrate Sodium             | 2.22                              | 5                |
| PAM/SS/NaCl                            | NaCl                       | 1.68                              | 6                |
| PEGDA/glycerin                         | CaCl <sub>2</sub> /KCl     | 0.765                             | 7                |
| PCBAA                                  | MgCl <sub>2</sub>          | 0.7                               | 8                |
| PAA/Fe <sub>3</sub> O <sub>4</sub> /IL | IL                         | 0.1                               | 9                |
| PVA/PSBMA                              | PSBMA                      | 0.05                              | 10               |
| P(SPMA-r-MMA)                          | SPMA                       | 6.7 $\times$ 10 <sup>-6</sup>     | 11               |
| PVA                                    | Emim-Cl                    | 1.6                               | 12               |
| PAAm/Gelatin DN                        | Na <sub>3</sub> Cit        | 1.5                               | 13               |
| chitosan/PEGDA                         | citrate anionic solution   | 0.5                               | 14               |
| allyl cellulose                        | NaOH                       | 0.16                              | 15               |
| agar/polyacrylamide                    | NaCl                       | 0.04                              | 16               |
| Cellulose                              | EG/NaCl                    | 1.92                              | 17               |



**Table S3.** Sensitivity ( $S$ ) of the reported flexible pressure sensors.

| Materials                                    | $S$ (kPa <sup>-1</sup> ) | Transparent | Reference        |
|----------------------------------------------|--------------------------|-------------|------------------|
| PAA/silver nanoparticles hydrogel            | 171                      | No          | 18               |
| PU-IL composite foam                         | 9280                     | No          | 19               |
| Alginate hydrogel                            | 9.32                     | Yes         | 20               |
| Cellulose/PVA                                | 13.91                    | Yes         | 21               |
| <i>Cellulose</i>                             | <i>89.81</i>             | <i>Yes</i>  | <i>This work</i> |
| CNF/BNC complex                              | 0.003                    | No          | 22               |
| ACC/PAA/alginate                             | 0.17                     | No          | 23               |
| PVA/PU                                       | 0.141                    | Yes         | 24               |
| PNDU-CNF@CNT                                 | 1.11                     | Yes         | 25               |
| $\kappa$ -CG/P(AAm-co-AAc) hydrogels         | 0.33                     | No          | 26               |
| CHN                                          | 0.6                      | Yes         | 27               |
| gelatin/DATNFC/Fe <sup>3+</sup> hydrogel     | 1.14                     | No          | 28               |
| polyacrylamide-alginate hydrogel             | 0.91                     | Yes         | 29               |
| PVA- H <sub>3</sub> PO <sub>4</sub> hydrogel | 2296                     | No          | 30               |
| PGMH                                         | 14.117                   | No          | 31               |
| PVA hydrogel                                 | 1.09                     | No          | 32               |

## References

1. R. A. Li, K. L. Zhang, L. Cai, G. X. Chen and M. H. He, *Polymer*, 2019, **167**, 154-158.
2. Z. Chen, H. Zhuo, Y. Hu, H. Lai, L. Liu, L. Zhong and X. Peng, *Advanced Functional Materials*, 2020, **30**, 1910292.
3. H. L. Li, T. Lv, N. Li, Y. Yao, K. Liu and T. Chen, *Nanoscale*, 2017, **9**, 18474-18481.
4. Y. Zhou, C. Wan, Y. Yang, H. Yang, S. Wang, Z. Dai, K. Ji, H. Jiang, X. Chen and Y. Long, *Adv. Funct. Mater.*, 2019, **29**.
5. Q. Liu, Z. Liu, C. Li, K. Xie, P. Zhu, B. Shao, J. Zhang, J. Yang, J. Zhang, Q. Wang and C. F. Guo, *Adv Sci (Weinh)*, 2020, **7**, 2000348.
6. S. J. Chen, J. P. Xie, J. S. Liu, X. T. Huang and C. Wang, *J Mater Sci*, 2021, **56**, 2725-2737.
7. J. Song, S. Chen, L. Sun, Y. Guo, L. Zhang, S. Wang, H. Xuan, Q. Guan and Z. You, *Adv. Mater.*, 2020, **32**, e1906994.
8. C. J. Lee, H. Y. Wu, Y. Hu, M. Young, H. F. Wang, D. Lynch, F. J. Xu, H. B. Cong and G. Cheng, *Acs Appl Mater Inter*, 2018, **10**, 5845-5852.
9. L. M. Zhang, Y. He, S. Cheng, H. Sheng, K. Dai, W. J. Zheng, M. X. Wang, Z. S. Chen, Y. M. Chen and Z. Suo, *Small*, 2019, **15**, e1804651.
10. Z. W. Wang, J. Chen, L. F. Wang, G. R. Gao, Y. Zhou, R. Wang, T. Xu, J. B. Yin and J. Fu, *J Mater Chem B*, 2019, **7**, 24-29.
11. J. Lee, M. W. M. Tan, K. Parida, G. Thangavel, S. A. Park, T. Park and P. S. Lee, 2020, **32**, 1906679.
12. S. Horike, Q. Wei, K. Kirihara, M. Mukaida, T. Sasaki, Y. Koshiba, T. Fukushima and K. Ishida, *ACS Appl Mater Interfaces*, 2020, **12**, 43674-43683.
13. X. Sun, F. Yao, C. Wang, Z. Qin, H. Zhang, Q. Yu, H. Zhang, X. Dong, Y. Wei and J. Li, *Macromol Rapid Commun*, 2020, **41**, e2000185.
14. Z. Deng, T. Qian and F. Hang, *ACS Biomater Sci Eng*, 2020, **6**, 7061-7070.
15. R. Tong, G. Chen, D. Pan, H. Qi, R. Li, J. Tian, F. Lu and M. He, *Biomacromolecules*, 2019, **20**, 2096-2104.
16. W. Hou, N. Sheng, X. Zhang, Z. Luan, P. Qi, M. Lin, Y. Tan, Y. Xia, Y. Li and K. Sui, *Carbohydr Polym*, 2019, **211**, 322-328.
17. C. Qin and A. Lu, *Carbohydr Polym*, 2021, **274**, 118667.
18. H. Ding, Z. Xin, Y. Yang, Y. Luo, K. Xia, B. Wang, Y. Sun, J. Wang, Y. Zhang, H. Wu, S. Fan, L. Zhang and K. Liu, 2020, **30**, 1909616.
19. Q. Liu, Y. Liu, J. Shi, Z. Liu, Q. Wang and C. F. Guo, *Nano-Micro Letters*, 2021, **14**, 21.
20. Y. Tai and Z. Yang, 2017, **4**, 1700496.
21. Y. Wang, L. Zhang and A. Lu, *Journal of Materials Chemistry A*, 2020, **8**, 13935-13941.
22. S. Chen, Y. L. Chen, D. Q. Li, Y. L. Xu and F. Xu, *Acs Appl Mater Inter*, 2021, **13**, 8754-8763.
23. Z. Lei, Q. Wang, S. Sun, W. Zhu and P. Wu, 2017, **29**, 1700321.

24. S. Lee, S. Franklin, F. A. Hassani, T. Yokota, M. O. G. Nayeem, Y. Wang, R. Leib, G. Cheng, D. W. Franklin and T. Someya, *Science*, 2020, **370**, 966-970.
25. L. Jia, S. Wu, R. Yuan, T. Xiang and S. Zhou, *ACS Applied Materials & Interfaces*, 2022, **14**, 27371-27382.
26. L. Zhou, Z. Wang, C. Wu, Y. Cong, R. Zhang and J. Fu, *ACS Applied Materials & Interfaces*, 2020, **12**, 51969-51977.
27. Y. Hu, M. Zhang, C. Qin, X. Qian, L. Zhang, J. Zhou and A. Lu, *Carbohydrate Polymers*, 2021, **265**, 118078.
28. H. Fu, B. Wang, J. Li, J. Xu, J. Li, J. Zeng, W. Gao and K. Chen, *Materials Horizons*, 2022, **9**, 1412-1421.
29. H. Ding, Z. Wu, H. Wang, Z. Zhou, Y. Wei, K. Tao, X. Xie and J. Wu, *Materials Horizons*, 2022, **9**, 1935-1946.
30. L. Pan, L. Han, H. Liu, J. Zhao, Y. Dong and X. Wang, *Chemical Engineering Journal*, 2022, **450**, 137929.
31. G. Xue, Y. Shi, S. Wang, H. Zhou, Z. Chen, W. Guo, Y. Yang and M. Ye, *Chemical Engineering Journal*, 2023, **456**, 140976.
32. W. Zhu, J. Wang, W. Sun, S. Zhou and M. He, *Chemical Engineering Journal*, 2023, **451**, 138335.
